# Supplementary material
Source: PubMed Central journal article supplement (PMC3487546)
Supplement: supp_2012.063420_2012_063420-Contributions.pdf [file supp_2012.063420_2012_063420-Contributions.pdf]

**Manuscript no. HAEMATOL/2012/063420 entitled "Infections in myelodysplastic syndromes: a review"**

**Authors: Andrea Toma, Pierre Fenaux, François Dreyfus, Catherine Cordonnier**

**Information about the contributions of each person named as having participated in the study**

1) **Guarantor(s)**, i.e., person(s) who is (are) responsible for the integrity of the work as a whole:  
• Andréa Toma, Department of Hematology, Assistance Publique-Hôpitaux de Paris (APHP), Henri Mondor University Hospital, Créteil, email address : andrea.toma@hmn.aphp.fr

According to the International Committee of Medical Journal Editors (ICMJE) ([http://www.icmje.org/ethical\\_1author.html](http://www.icmje.org/ethical_1author.html)): "Authorship credit should be based on: 1) substantial contributions to conception and design, acquisition of data, or analysis and interpretation of data; 2) drafting the article or revising it critically for important intellectual content; and 3) final approval of the version to be published. Authors should meet conditions 1, 2, and 3 ..... Acquisition of funding, collection of data, or general supervision of the research group alone does not constitute authorship".

**The guarantors of this manuscript confirm that all persons designated as authors qualify for authorship, and that each author has participated sufficiently in the work to take public responsibility for appropriate portions of the content.**

2) **Authors who participated in the conception of the study:** Andréa Toma, Catherine Cordonnier

3) **Design & Methods.** The following authors were responsible for specific investigations :  
• Andréa Toma and Catherine Cordonnier were responsible for reviewing the literature

4) **Results.** The following authors were responsible for specific portions of the results, including figures and tables :  
• NA

5) **Writing the manuscript.** The following authors were responsible for writing the manuscript:  
• Andréa Toma was responsible for writing the draft manuscript, and finalizing the paper  
• All four authors (Andréa Toma, Pierre Fenaux, François Dreyfus, Catherine Cordonnier) finalized the manuscript

6) **Contributors Listed in Acknowledgments:**  
The authors thank Brandon J Farley for editorial assistance
